# Supplementary material for: Exploration and detection of potential regulatory variants in refractive error GWAS
Source: PubMed Central journal article supplement (PMC5015044; doi:10.1038/srep33090), 2016-09-08
Supplement: srep33090-s1.pdf [file srep33090-s1.pdf]

Supplementary Information:

**Exploration and detection of potential regulatory variants in refractive error GWAS**

Xuan Liao, ChangJun Lan, Dan Liao, Jing Tian, XiuQi Huang

**Supplementary Table S1. Index SNPs from published GWAS and Proxy SNPs from SNAP search in LD at tested  $r^2$  thresholds.**

| Index SNP<br>(Genes/Loci)*       | Proxy SNP      |                |             |
|----------------------------------|----------------|----------------|-------------|
|                                  | $r^2 \geq 0.8$ | $r^2 \geq 0.9$ | $r^2 = 1.0$ |
| <b>rs1652333</b>                 | rs1652333      | rs1652333      | rs1652333   |
| <i>C4BPAP2 (pseudogene)/CD55</i> | rs2802233      | rs2802233      | rs2802233   |
|                                  | rs2802234      | rs2802234      | rs2802234   |
|                                  | rs2802236      | rs2802236      | rs2802236   |
|                                  | rs2782845      | rs2782845      | rs2782845   |
|                                  | rs971318       | rs971318       | rs971318    |
|                                  | rs971317       | rs971317       | rs971317    |
|                                  | rs2802238      | rs2802238      | rs2802238   |
|                                  | rs1572275      | rs1572275      | rs1572275   |
|                                  | rs2802217      | rs2802217      | rs2802217   |
|                                  | rs2564974      | rs2564974      | rs2564974   |
|                                  | rs12095015     | rs12095015     | rs12095015  |
|                                  | rs2017760      | rs2017760      | rs2017760   |
|                                  | rs1858001      | rs1858001      | rs1858001   |
|                                  | rs2914937      | rs2914937      | rs2914937   |
|                                  | rs891378       | rs891378       | rs891378    |
|                                  | rs891376       | rs891376       | rs891376    |
|                                  | rs10864181     | rs10864181     | rs10864181  |
|                                  | rs2564978      | rs2564978      | rs2564978   |
|                                  | rs10864180     | rs10864180     | rs10864180  |
|                                  | rs10864178     | rs10864178     | rs10864178  |
|                                  | rs2782828      | rs2782828      | rs2782828   |
|                                  | rs6703857      | rs6703857      | rs6703857   |
|                                  | rs6540896      | rs6540896      | rs6540896   |
|                                  | rs4844591      | rs4844591      | rs4844591   |
|                                  | rs4844592      | rs4844592      | rs4844592   |
|                                  | rs6700079      | rs6700079      | rs6700079   |
|                                  | rs6702997      | rs6702997      | rs6702997   |
|                                  | rs6703002      | rs6703002      | rs6703002   |
|                                  | rs6700168      | rs6700168      | rs6700168   |
|                                  | rs7548463      | rs7548463      | rs7548463   |
|                                  | rs925130       | rs925130       | rs925130    |
|                                  | rs925131       | rs925131       | rs925131    |
|                                  | rs2184476      | rs2184476      | rs2184476   |
|                                  | rs6662070      | rs6662070      | rs6662070   |
|                                  | rs10864231     | rs10864231     | rs10864231  |
|                                  | rs11120733     | rs11120733     | rs11120733  |
|                                  | rs1507758      | rs1507758      | rs1507758   |

|             |             |             |
|-------------|-------------|-------------|
| rs10864175  | rs10864175  | rs10864175  |
| rs7555030   | rs7555030   | rs7555030   |
| rs7512422   | rs7512422   | rs7512422   |
| rs1507760   | rs1507760   | rs1507760   |
| rs1507761   | rs1507761   | rs1507761   |
| rs113231892 | rs113231892 | rs113231892 |
| rs1835307   | rs1835307   | rs1835307   |
| rs7543250   | rs7543250   | rs7543250   |
| rs7545125   | rs7545125   | rs7545125   |
| rs112172464 | rs112172464 | rs112172464 |
| rs111911746 | rs111911746 | rs111911746 |
| rs877049    | rs877049    | rs877049    |
| rs112720427 | rs112720427 | rs112720427 |
| rs10864167  | rs10864167  | rs10864167  |
| rs113896552 | rs113896552 | rs113896552 |
| rs112511970 | rs112511970 | rs112511970 |
| rs1429906   | rs1429906   | rs1429906   |
| rs116218947 | rs116218947 | rs116218947 |
| rs6664815   | rs6664815   | rs6664815   |
| rs79515725  | rs79515725  | rs79515725  |
| rs113849985 | rs113849985 | rs113849985 |
| rs7522701   | rs7522701   | rs7522701   |
| rs77542432  | rs77542432  | rs10746462  |
| rs6703860   | rs6703860   | rs10746463  |
| rs6681853   | rs6681853   |             |
| rs11120586  | rs11120586  |             |
| rs1507757   | rs1507757   |             |
| rs12133548  | rs12133548  |             |
| rs1507759   | rs1507759   |             |
| rs113742197 | rs113742197 |             |
| rs7533825   | rs7533825   |             |
| rs1864370   | rs1864370   |             |
| rs1354942   | rs1354942   |             |
| rs10746462  | rs10746462  |             |
| rs2564975   | rs2564975   |             |
| rs4611012   | rs4611012   |             |
| rs10864156  | rs10864156  |             |
| rs6671700   | rs10746463  |             |
| rs6540888   | rs2135923   |             |
| rs1367067   |             |             |
| rs59036171  |             |             |
| rs1579484   |             |             |

|                                                          |                                                                                                                                                                           |                                                                                                        |                                                  |
|----------------------------------------------------------|---------------------------------------------------------------------------------------------------------------------------------------------------------------------------|--------------------------------------------------------------------------------------------------------|--------------------------------------------------|
|                                                          | rs11120688                                                                                                                                                                |                                                                                                        |                                                  |
|                                                          | rs1656404                                                                                                                                                                 |                                                                                                        |                                                  |
|                                                          | rs2853443                                                                                                                                                                 |                                                                                                        |                                                  |
|                                                          | rs2573206                                                                                                                                                                 |                                                                                                        |                                                  |
|                                                          | rs733603                                                                                                                                                                  |                                                                                                        |                                                  |
|                                                          | rs10746463                                                                                                                                                                |                                                                                                        |                                                  |
|                                                          | rs2135923                                                                                                                                                                 |                                                                                                        |                                                  |
|                                                          | rs1346720                                                                                                                                                                 |                                                                                                        |                                                  |
| <b>rs1656404</b><br><i>ECEL1/PRSS56</i>                  | rs1656404<br>rs2853443                                                                                                                                                    | rs1656404<br>rs2853443                                                                                 | rs1656404                                        |
| <b>rs1881492</b><br><i>CHRNA2</i>                        | rs1881492<br>rs2573206<br>rs733603                                                                                                                                        | rs1881492<br>rs2573206                                                                                 | rs1881492                                        |
| <b>rs14165</b><br><i>CACNAID/CHDH</i>                    | rs14165<br>rs920252<br>rs893362<br>rs4687587<br>rs4687586<br>rs12676                                                                                                      | rs14165                                                                                                | rs14165                                          |
| <b>rs1960445</b><br><i>C4orf22&amp;LOC105377305/BMP3</i> | rs1960445<br>rs4458448<br>rs963857<br>rs10049776<br>rs9307776<br>rs17005016<br>rs2868079<br>rs10004901<br>rs11099457<br>rs4693773<br>rs10003846<br>rs4693767<br>rs6814223 | rs1960445<br>rs4458448<br>rs963857<br>rs10049776<br>rs9307776<br>rs17005016<br>rs2868079<br>rs10004901 | rs1960445<br>rs4458448<br>rs963857<br>rs10049776 |
| <b>rs12205363</b><br><i>LAMA2</i>                        | rs12205363                                                                                                                                                                | rs12205363                                                                                             | rs12205363                                       |
| <b>rs4237036</b><br><i>CHD7</i>                          | rs4237036<br>rs13280978                                                                                                                                                   | rs4237036<br>rs13280978                                                                                | rs4237036<br>rs13280978                          |

|                               |            |            |            |
|-------------------------------|------------|------------|------------|
|                               | rs35168272 | rs35168272 | rs35168272 |
|                               | rs4738826  | rs4738826  | rs4738826  |
|                               | rs28609390 | rs28609390 | rs28609390 |
|                               | rs1483208  | rs1483208  | rs1483208  |
|                               | rs876957   | rs876957   | rs876957   |
|                               | rs28710955 | rs28710955 | rs28710955 |
|                               | rs4738829  | rs4738829  |            |
|                               | rs4738828  | rs4738828  |            |
|                               | rs7011801  | rs7011801  |            |
|                               | rs10106752 | rs10106752 |            |
|                               | rs1017862  | rs1017862  |            |
|                               | rs1017861  | rs1017861  |            |
|                               | rs10283352 | rs10283352 |            |
|                               | rs13264416 |            |            |
|                               | rs1473446  |            |            |
|                               | rs10104525 |            |            |
|                               | rs35331770 |            |            |
|                               | rs4738816  |            |            |
|                               | rs28600309 |            |            |
|                               | rs4738814  |            |            |
| <b>rs7837791</b>              | rs7837791  | rs7837791  | rs7837791  |
| <i>TOX&amp; LOC100505501/</i> | rs7832404  | rs7832404  |            |
| <i>RNA5SP267 (pseudogene)</i> | rs7812962  |            |            |
| <b>rs7829127</b>              | rs7829127  | rs7829127  | rs7829127  |
| <i>ZMAT4</i>                  | rs16890057 | rs16890057 | rs16890057 |
|                               | rs869422   | rs869422   | rs869422   |
|                               | rs16890054 | rs16890054 | rs4736884  |
|                               | rs11776583 | rs11776583 |            |
|                               | rs2137277  | rs2137277  |            |
|                               | rs2137278  | rs2137278  |            |
|                               | rs72644322 | rs72644322 |            |
|                               | rs72641600 | rs72641600 |            |
|                               | rs35015019 | rs35015019 |            |
|                               | rs4736884  | rs4736884  |            |
|                               | rs72632903 | rs72632903 |            |
|                               | rs7005382  | rs7005382  |            |
|                               | rs6994354  |            |            |
|                               | rs4736886  |            |            |
| <b>rs7042950</b>              | rs7042950  | rs7042950  | rs7042950  |

|                                             |             |            |            |
|---------------------------------------------|-------------|------------|------------|
| <b>RORB</b>                                 | rs13289812  | rs13289812 | rs13289812 |
|                                             | rs10869416  | rs10869416 |            |
|                                             | rs10869417  | rs10869417 |            |
|                                             | rs10869418  |            |            |
|                                             | rs13283886  |            |            |
|                                             | rs117588997 |            |            |
|                                             | rs7867494   |            |            |
|                                             | rs7024262   |            |            |
|                                             | rs10869412  |            |            |
| <b>rs10882165</b>                           | rs10882165  | rs10882165 | rs10882165 |
| <b>CYP26A1&amp;NIP7P1 (pseudogene)/Exon</b> | rs56871408  | rs56871408 | rs56871408 |
|                                             | rs11187304  | rs11187304 |            |
|                                             | rs6583867   | rs6583867  |            |
|                                             | rs10882169  | rs10882169 |            |
|                                             | rs7078201   | rs7078201  |            |
|                                             | rs7078310   | rs7078310  |            |
|                                             | rs7916761   | rs7916761  |            |
|                                             | rs12357177  | rs12357177 |            |
|                                             | rs11187313  | rs11187313 |            |
|                                             | rs11187314  | rs11187314 |            |
|                                             | rs7916838   | rs7916838  |            |
|                                             | rs7917125   | rs7917125  |            |
|                                             | rs4918865   | rs4918865  |            |
|                                             | rs10882172  | rs10882172 |            |
|                                             | rs7919934   | rs7919934  |            |
|                                             | rs7903804   | rs7903804  |            |
|                                             | rs17108260  | rs17108260 |            |
|                                             | rs17382981  | rs17382981 |            |
|                                             | rs72815184  | rs72815184 |            |
|                                             | rs72815186  | rs72815186 |            |
|                                             | rs7894625   | rs7894625  |            |
|                                             | rs117531235 |            |            |
|                                             | rs12360392  |            |            |
|                                             | rs12358810  |            |            |
|                                             | rs10882163  |            |            |
|                                             | rs11187298  |            |            |
|                                             | rs10882157  |            |            |
|                                             | rs72815193  |            |            |
|                                             | rs55744367  |            |            |
|                                             | rs57346439  |            |            |
|                                             | rs7920484   |            |            |

**rs7084402**

***LOC105378316/ BICC1***

|            |            |            |
|------------|------------|------------|
| rs7084402  | rs7084402  | rs7084402  |
| rs12250013 | rs12250013 | rs12250013 |
| rs12259315 | rs12259315 | rs12259315 |
| rs12257983 | rs12257983 | rs12257983 |
| rs1863665  | rs1863665  | rs1863665  |
| rs1863664  | rs1863664  | rs1863664  |
| rs1346301  | rs1346301  | rs1346301  |
| rs1427204  | rs1427204  | rs1427204  |
| rs1427202  | rs1427202  | rs1427202  |
| rs717452   | rs717452   | rs717452   |
| rs4113952  | rs4113952  | rs4113952  |
| rs6481400  | rs6481400  | rs6481400  |
| rs6481401  | rs6481401  | rs6481401  |
| rs6481402  | rs6481402  | rs6481402  |
| rs7917717  | rs7917717  | rs7917717  |
| rs11006169 | rs11006169 | rs11006169 |
| rs34774248 | rs34774248 | rs34774248 |
| rs36097682 | rs36097682 | rs36097682 |
| rs1427201  | rs1427201  | rs1427201  |
| rs7910442  | rs7910442  | rs7910442  |
| rs7095501  | rs7095501  | rs7095501  |
| rs7073504  | rs7073504  | rs7073504  |
| rs7074778  | rs7074778  | rs7074778  |
| rs28426375 | rs28426375 | rs28426375 |
| rs1346302  | rs1346302  |            |
| rs7921207  | rs7921207  |            |
| rs7091440  | rs7091440  |            |
| rs7087998  | rs7087998  |            |
| rs11817440 | rs11817440 |            |
| rs7100474  | rs7100474  |            |
| rs7079648  | rs7079648  |            |
| rs7078900  | rs7078900  |            |
| rs10763551 | rs10763551 |            |
| rs10763552 | rs10763552 |            |
| rs10826198 | rs10826198 |            |
| rs10826199 | rs10826199 |            |
| rs7897298  | rs7897298  |            |
| rs1427200  | rs1427200  |            |
| rs1427199  | rs1427199  |            |
| rs1427198  | rs1427198  |            |
| rs1427197  | rs1427197  |            |

|            |            |
|------------|------------|
| rs1896243  | rs1896243  |
| rs11006170 | rs11006170 |
| rs7094882  | rs7094882  |
| rs7098326  | rs7098326  |
| rs7097576  | rs7097576  |
| rs7098606  | rs7098606  |
| rs2170779  | rs2170779  |
| rs1365741  | rs1365741  |
| rs1365740  | rs1365740  |
| rs12242287 | rs12242287 |
| rs11006171 | rs11006171 |
| rs1427196  | rs1427196  |
| rs1649034  | rs1649034  |
| rs1649033  | rs1649033  |
| rs1649032  | rs1649032  |
| rs1649030  | rs1649030  |
| rs1658496  | rs1658496  |
| rs1658495  | rs1658495  |
| rs1658494  | rs1658494  |
| rs1649028  | rs1649028  |
| rs1649027  | rs1649027  |
| rs1658493  | rs1658493  |
| rs1658491  | rs1658491  |
| rs1649026  | rs1649026  |
| rs1649025  | rs1649025  |
| rs1658490  | rs1658490  |
| rs3001714  | rs3001714  |
| rs1649023  | rs1649023  |
| rs1649022  | rs1649022  |
| rs1658489  | rs1658489  |
| rs6481404  | rs6481404  |
| rs2577393  | rs2577393  |
| rs1658486  | rs1658486  |
| rs1649019  | rs1649019  |
| rs1649018  | rs1649018  |
| rs1658485  | rs1658485  |
| rs1658483  | rs1658483  |
| rs1649015  | rs1649015  |
| rs1658481  | rs1658481  |
| rs1658480  | rs1658480  |
| rs1649092  | rs1649092  |
| rs1658479  | rs1658479  |



|            |            |
|------------|------------|
| rs1649091  | rs1649091  |
| rs1658478  | rs1658478  |
| rs1658477  | rs1658477  |
| rs1427224  | rs1427224  |
| rs1427223  | rs1427223  |
| rs1427222  | rs1427222  |
| rs1593678  | rs1593678  |
| rs1593677  | rs1593677  |
| rs1593674  | rs1593674  |
| rs1649085  | rs1649085  |
| rs1649084  | rs1649084  |
| rs1658470  | rs1658470  |
| rs1658469  | rs1658469  |
| rs1649082  | rs1649082  |
| rs1649081  | rs1649081  |
| rs1658468  | rs1658468  |
| rs1649080  | rs1649080  |
| rs1649077  | rs1649077  |
| rs1649076  | rs1649076  |
| rs1593672  | rs1593672  |
| rs1626532  | rs1626532  |
| rs1658467  | rs1658467  |
| rs1649074  | rs1649074  |
| rs1582827  | rs1582827  |
| rs12259990 | rs12259990 |
| rs12261597 | rs12261597 |
| rs1649072  | rs1649072  |
| rs1658463  | rs1658463  |
| rs1658462  | rs1658462  |
| rs1303970  | rs1303970  |
| rs1303968  | rs1303968  |
| rs1658460  | rs1658460  |
| rs1658459  | rs1658459  |
| rs7087528  | rs7087528  |
| rs1658458  | rs1658458  |
| rs1619284  | rs1619284  |
| rs1658457  | rs1658457  |
| rs1649069  | rs1649069  |
| rs1649066  | rs1649066  |
| rs1649065  | rs1649065  |
| rs1658454  | rs1658454  |
| rs1614258  | rs1614258  |

|            |            |
|------------|------------|
| rs1649063  | rs1649063  |
| rs1649062  | rs1649062  |
| rs1649060  | rs1649060  |
| rs1658452  | rs1658452  |
| rs1658451  | rs1658451  |
| rs1649059  | rs1649059  |
| rs12569559 | rs12569559 |
| rs1658447  | rs1658447  |
| rs1658446  | rs1658446  |
| rs1620186  | rs1620186  |
| rs2114564  | rs2114564  |
| rs2438182  | rs2438182  |
| rs1820542  | rs1820542  |
| rs7099881  | rs7099881  |
| rs1658443  | rs1658443  |
| rs1649058  | rs1649058  |
| rs1649057  | rs1649057  |
| rs1658442  | rs1658442  |
| rs1649055  | rs1649055  |
| rs1623568  | rs1623568  |
| rs1621811  | rs1621811  |
| rs1658440  | rs1658440  |
| rs1649049  | rs1649049  |
| rs1649048  | rs1649048  |
| rs1658439  | rs1658439  |
| rs1649046  | rs1649046  |
| rs1658438  | rs1658438  |
| rs1658436  | rs1658436  |
| rs1649045  | rs1649045  |
| rs1658435  | rs1658435  |
| rs1621227  | rs1621227  |
| rs1620404  | rs1620404  |
| rs1626606  | rs1626606  |
| rs1649043  | rs1649043  |
| rs1649042  | rs1649042  |
| rs1658434  | rs1658434  |
| rs1649041  | rs1649041  |
| rs11815274 | rs11815274 |
| rs1658432  | rs1658432  |
| rs3001717  | rs3001717  |
| rs2917949  | rs2917949  |
| rs2577392  | rs2577392  |

|            |            |
|------------|------------|
| rs2842083  | rs2842083  |
| rs1649039  | rs1649039  |
| rs1658429  | rs1658429  |
| rs1649038  | rs1649038  |
| rs7921371  | rs7921371  |
| rs1649037  | rs1649037  |
| rs1658427  | rs1658427  |
| rs1658425  | rs1658425  |
| rs1658424  | rs1658424  |
| rs1658423  | rs1658423  |
| rs1658422  | rs1658422  |
| rs1649036  | rs1649036  |
| rs1658421  | rs1658421  |
| rs1649035  | rs1649035  |
| rs1658419  | rs1658419  |
| rs1658418  | rs1658418  |
| rs2393448  | rs2393448  |
| rs717453   | rs717453   |
| rs10763553 | rs10763553 |
| rs1896246  | rs1896246  |
| rs12264028 | rs12264028 |
| rs12248958 | rs12248958 |
| rs1427195  | rs1427195  |
| rs1658492  | rs1658492  |
| rs1632584  | rs1632584  |
| rs1593675  | rs1593675  |
| rs1658456  | rs1658456  |
| rs1649068  | rs1649068  |
| rs4141671  | rs4141671  |
| rs4948523  | rs4948523  |
| rs10763556 | rs10763556 |
| rs10763558 | rs10763558 |
| rs2393449  | rs2393449  |
| rs7474570  | rs7474570  |
| rs12263522 | rs12263522 |
| rs11006192 | rs11006192 |
| rs10763559 | rs10763559 |
| rs10740731 | rs10740731 |
| rs4948524  | rs4948524  |
| rs10740732 | rs10740732 |
| rs10826202 | rs10826202 |
| rs10763564 | rs10763564 |

|            |            |
|------------|------------|
| rs893370   | rs893370   |
| rs1649021  | rs1649021  |
| rs1649089  | rs1649089  |
| rs1658471  | rs1658471  |
| rs1593673  | rs1593673  |
| rs1579394  | rs1579394  |
| rs1649067  | rs1649067  |
| rs1658455  | rs1658455  |
| rs1658453  | rs1658453  |
| rs1158212  | rs1158212  |
| rs1649051  | rs1649051  |
| rs1658441  | rs1658441  |
| rs1658428  | rs1658428  |
| rs1658426  | rs1658426  |
| rs1896244  | rs1896244  |
| rs7098329  | rs7098329  |
| rs1649031  | rs1649031  |
| rs7914888  | rs7914888  |
| rs3001715  | rs3001715  |
| rs1346300  | rs1346300  |
| rs1649017  | rs1649017  |
| rs1649016  | rs1649016  |
| rs1658484  | rs1658484  |
| rs1649079  | rs1649079  |
| rs1649078  | rs1649078  |
| rs1582826  | rs1582826  |
| rs1593670  | rs1593670  |
| rs1649044  | rs1649044  |
| rs1658417  | rs1658417  |
| rs10763557 | rs10763557 |
| rs4245599  | rs4245599  |
| rs1593671  |            |
| rs1896245  |            |
| rs4948525  |            |
| rs7099496  |            |
| rs2033149  |            |

**rs11601239**  
**GRIA4**

|            |            |            |
|------------|------------|------------|
| rs11601239 | rs11601239 | rs11601239 |
| rs7106983  | rs7106983  | rs7106983  |
| rs11226825 | rs11226825 | rs11226825 |
| rs1838668  | rs1838668  | rs1838668  |
| rs994575   | rs994575   | rs994575   |

|            |            |            |
|------------|------------|------------|
| rs12790329 | rs12790329 | rs12790329 |
| rs11226827 | rs11226827 | rs11226827 |
| rs10791767 | rs10791767 | rs10791767 |
| rs12417624 | rs12417624 | rs12417624 |
| rs7926520  | rs7926520  | rs7926520  |
| rs7931588  | rs7931588  | rs7931588  |
| rs1938963  | rs1938963  | rs1938963  |
| rs1954762  | rs1954762  | rs1954762  |
| rs1445607  | rs1445607  |            |
| rs10895857 | rs10895857 |            |
| rs10895856 | rs10895856 |            |
| rs977516   | rs977516   |            |
| rs10895860 | rs10895860 |            |
| rs1445618  | rs1445618  |            |
| rs61900312 | rs61900312 |            |
| rs1822993  | rs1822993  |            |
| rs11226828 | rs11226828 |            |
| rs1445619  | rs1445619  |            |
| rs10895864 | rs10895864 |            |
| rs1373926  | rs1373926  |            |
| rs638099   | rs638099   |            |
| rs11601808 | rs11601808 |            |
| rs521893   | rs521893   |            |
| rs627041   | rs627041   |            |
| rs499945   | rs499945   |            |
| rs590928   | rs590928   |            |
| rs556609   | rs556609   |            |
| rs687502   | rs687502   |            |
| rs632100   | rs632100   |            |
| rs2155043  | rs2155043  |            |
| rs10895871 | rs10895871 |            |
| rs10895872 | rs10895872 |            |
| rs7932892  | rs7932892  |            |
| rs7944207  | rs7944207  |            |
| rs1938970  | rs1938970  |            |
| rs1938971  | rs1938971  |            |
| rs7928594  | rs7928594  |            |
| rs2028816  | rs2028816  |            |
| rs1938964  | rs1938964  |            |
| rs639076   | rs639076   |            |
| rs12290919 | rs12290919 |            |
| rs1445622  | rs1445622  |            |

|                                                                          |            |            |           |
|--------------------------------------------------------------------------|------------|------------|-----------|
|                                                                          | rs11226835 | rs11226835 |           |
|                                                                          | rs519193   |            |           |
|                                                                          | rs1938965  |            |           |
|                                                                          | rs10895870 |            |           |
|                                                                          | rs11226822 |            |           |
|                                                                          | rs1037090  |            |           |
|                                                                          | rs1445617  |            |           |
|                                                                          | rs1822989  |            |           |
| <b>rs3138144</b>                                                         | rs3138144  | rs3138144  | rs3138144 |
| <b><i>RDH5</i></b>                                                       | rs3138137  | rs3138137  | rs3138137 |
| <b>rs2184971</b>                                                         | rs2184971  | rs2184971  | rs2184971 |
| <b><i>PCCA</i></b>                                                       | rs2152881  | rs2152881  | rs2152881 |
|                                                                          | rs2390401  | rs2390401  |           |
| <b>rs8000973</b>                                                         | rs8000973  | rs8000973  | rs8000974 |
| <b><i>ZIC2 &amp; NDUFA12P1 (pseudogene)/<br/>ASNSP3 (pseudogene)</i></b> | rs12018015 | rs12018015 |           |
|                                                                          | rs3848025  |            |           |
|                                                                          | rs9517967  |            |           |
|                                                                          | rs9517968  |            |           |
|                                                                          | rs7321870  |            |           |
|                                                                          | rs7320677  |            |           |
|                                                                          | rs9517971  |            |           |
|                                                                          | rs9517973  |            |           |
|                                                                          | rs9517974  |            |           |
|                                                                          | rs12870800 |            |           |
|                                                                          | rs9513722  |            |           |
|                                                                          | rs9513723  |            |           |
|                                                                          | rs7322740  |            |           |
| <b>rs524952</b>                                                          | rs524952   | rs524952   | rs524953  |
| <b><i>LOC105370762/ GJD2</i></b>                                         | rs634990   | rs634990   |           |
|                                                                          | rs16959560 |            |           |
|                                                                          | rs685352   |            |           |
| <b>rs4778879</b>                                                         | rs4778879  | rs4778879  | rs4778880 |
| <b><i>RASGRF1</i></b>                                                    | rs7183818  | rs7183818  |           |
|                                                                          | rs6495366  | rs6495366  |           |
|                                                                          | rs6495367  |            |           |
|                                                                          | rs755362   |            |           |
|                                                                          | rs28412916 |            |           |

rs13380109  
rs13380104  
rs1007365  
rs1007366  
rs1961579  
rs4778634  
rs3851677  
rs745030  
rs4778882  
rs745029

**rs17183295**  
***MYO1D***

|             |            |
|-------------|------------|
| rs17183295  | rs17183295 |
| rs62070164  | rs62070164 |
| rs17780981  | rs17780981 |
| rs17183600  | rs17183600 |
| rs17183628  | rs17183628 |
| rs17781136  | rs17781136 |
| rs62070187  | rs62070187 |
| rs75782470  | rs75782470 |
| rs62068432  | rs62068432 |
| rs1990825   | rs1990825  |
| rs17183176  | rs17183176 |
| rs4795719   | rs4795719  |
| rs9898762   | rs9898762  |
| rs75822124  | rs75822124 |
| rs9303654   | rs9303654  |
| rs9912761   | rs9912761  |
| rs9911168   | rs9911168  |
| rs75393526  | rs75393526 |
| rs78418651  | rs78418651 |
| rs17183113  | rs17183113 |
| rs77819475  | rs77819475 |
| rs17781142  | rs17781142 |
| rs62070229  | rs10512441 |
| rs62070232  |            |
| rs10512441  |            |
| rs62067160  |            |
| rs62067167  |            |
| rs80212824  |            |
| rs17781005  |            |
| rs113602044 |            |
| rs62070183  |            |

|                                          |            |            |            |
|------------------------------------------|------------|------------|------------|
|                                          | rs76373015 |            |            |
|                                          | rs79957065 |            |            |
|                                          | rs79640811 |            |            |
| <b>rs4793501</b>                         | rs4793501  | rs4793501  | rs4793501  |
| <i>KCNJ2 &amp; CALM2P1 (pseudogene)/</i> |            |            |            |
| <i>LOC105371884</i>                      |            |            |            |
| <b>rs12971120</b>                        | rs12971120 | rs12971120 | rs12971120 |
| <i>CNDP2</i>                             | rs3829640  | rs3829640  | rs3829640  |
|                                          | rs2278162  | rs2278162  | rs2278162  |
|                                          | rs2278161  | rs2278161  | rs2278161  |
|                                          | rs734559   | rs734559   | rs734559   |
|                                          | rs4891559  | rs4891559  |            |
|                                          | rs34676212 | rs34676212 |            |
|                                          | rs7241558  | rs7241558  |            |
|                                          | rs8084410  | rs8084410  |            |
|                                          | rs8084109  | rs8084109  |            |
|                                          | rs3764509  | rs3764509  |            |
|                                          | rs8083001  | rs8083001  |            |
|                                          | rs3794955  |            |            |
|                                          | rs11151960 |            |            |
|                                          | rs11151961 |            |            |
|                                          | rs4891558  |            |            |
|                                          | rs4891557  |            |            |
|                                          | rs2278159  |            |            |
|                                          | rs2278158  |            |            |
|                                          | rs71359051 |            |            |
|                                          | rs12968731 |            |            |
|                                          | rs12608037 |            |            |
|                                          | rs2303463  |            |            |
|                                          | rs12605820 |            |            |
|                                          | rs3794953  |            |            |
|                                          | rs3764510  |            |            |
|                                          | rs2241510  |            |            |
|                                          | rs3794950  |            |            |
|                                          | rs747176   |            |            |
| <b>rs12193446</b>                        | rs12193446 | rs12193446 | rs12193446 |
| <i>LAMA2</i>                             |            |            |            |
| <b>rs1381566</b>                         | rs1381566  | rs1381566  | rs1381566  |



|                     |            |            |            |
|---------------------|------------|------------|------------|
| <i>LRRC4C</i>       | rs11602008 |            |            |
|                     | rs11606250 |            |            |
| <b>rs17648524</b>   | rs17648524 | rs17648524 | rs17648524 |
| <i>RBFOX1</i>       | rs10500355 | rs10500355 |            |
|                     | rs7184522  | rs7184522  |            |
|                     | rs4332760  | rs4332760  |            |
| <b>rs7744813</b>    | rs7744813  | rs7744813  | rs7744813  |
| <i>KCNQ5</i>        |            |            |            |
| <b>rs3138142</b>    | rs3138142  | rs3138142  | rs3138142  |
| <i>RDH5</i>         | rs3138141  | rs3138141  |            |
| <b>rs2137277</b>    | rs2137277  | rs2137277  | rs2137277  |
| <i>ZMAT4/ SFRP1</i> | rs2137278  | rs2137278  | rs2137278  |
|                     | rs72644322 | rs72644322 | rs72644322 |
|                     | rs4736886  | rs4736886  |            |
|                     | rs35015019 | rs35015019 |            |
|                     | rs4736884  | rs4736884  |            |
|                     | rs72632903 | rs72632903 |            |
|                     | rs7829127  | rs7829127  |            |
|                     | rs7005382  | rs7005382  |            |
|                     | rs6994354  | rs16890057 |            |
|                     | rs16890057 | rs869422   |            |
|                     | rs869422   |            |            |
|                     | rs16890054 |            |            |
|                     | rs11776583 |            |            |
|                     | rs72641600 |            |            |
|                     | rs11774708 |            |            |
|                     | rs17648449 |            |            |
|                     | rs13267110 |            |            |
|                     | rs11779358 |            |            |
|                     | rs7827879  |            |            |
|                     | rs11779532 |            |            |
|                     | rs11776113 |            |            |
|                     | rs11780608 |            |            |
|                     | rs9969525  |            |            |
|                     | rs6985757  |            |            |
|                     | rs11780139 |            |            |
|                     | rs35313163 |            |            |
|                     | rs35334145 |            |            |
|                     | rs11779864 |            |            |

|                                             |            |            |            |
|---------------------------------------------|------------|------------|------------|
|                                             | rs35365471 |            |            |
|                                             | rs13251462 |            |            |
|                                             | rs6474280  |            |            |
|                                             | rs6474283  |            |            |
|                                             | rs7816573  |            |            |
|                                             | rs7817426  |            |            |
|                                             | rs7821235  |            |            |
| <b>rs1550094</b>                            | rs1550094  | rs1550094  | rs1550094  |
| <b><i>PRSS56</i></b>                        | rs2117770  |            |            |
|                                             | rs2741290  |            |            |
|                                             | rs2141422  |            |            |
|                                             | rs2741289  |            |            |
|                                             | rs2853441  |            |            |
| <b>rs2908972</b>                            | rs2908972  | rs2908972  | rs2908972  |
| <b><i>SHISA6</i></b>                        |            |            |            |
| <b>rs17412774</b>                           | rs17412774 | rs17412774 | rs17412774 |
| <b><i>PABPCP2/ RNU7-2P (pseudogene)</i></b> | rs10928276 |            |            |
| <b><i>&amp; PABPCP2</i></b>                 | rs17491167 |            |            |
|                                             | rs10803514 |            |            |
|                                             | rs2130860  |            |            |
|                                             | rs61051986 |            |            |
|                                             | rs4662453  |            |            |
|                                             | rs1399669  |            |            |
|                                             | rs1399668  |            |            |
|                                             | rs7604349  |            |            |
|                                             | rs7577806  |            |            |
|                                             | rs72854321 |            |            |
|                                             | rs17491258 |            |            |
|                                             | rs2035788  |            |            |
|                                             | rs2035789  |            |            |
|                                             | rs12611909 |            |            |
|                                             | rs12621488 |            |            |
|                                             | rs11675490 |            |            |
|                                             | rs11681759 |            |            |
|                                             | rs2201049  |            |            |
|                                             | rs59126787 |            |            |
|                                             | rs62168236 |            |            |
|                                             | rs1515250  |            |            |
|                                             | rs1515248  |            |            |

rs1515247  
rs11691697  
rs6717099  
rs12612023  
rs62169493  
rs56075542  
rs61049169  
rs17733267  
rs17789747  
rs1515232  
rs7602000  
rs11674960

**rs11145746**  
***TJP2***

|            |            |            |
|------------|------------|------------|
| rs11145746 | rs11145746 | rs11145746 |
| rs56207218 | rs56207218 | rs56207218 |
| rs11145657 | rs11145657 | rs11145657 |
| rs4515615  | rs4515615  | rs4515615  |
| rs11145588 | rs11145588 | rs11145588 |
| rs11145582 | rs11145582 | rs11145582 |
| rs7469887  | rs7469887  | rs7469887  |
| rs1538583  | rs1538583  | rs1538583  |
| rs11145488 | rs11145488 | rs11145488 |
| rs11145465 | rs11145465 | rs11145465 |
| rs11145442 | rs11145442 | rs11145442 |
| rs11145461 | rs11145461 |            |
| rs11145422 | rs11145422 |            |
| rs11145421 | rs11145421 |            |
| rs11145415 | rs11145415 |            |
| rs11145411 | rs11145411 |            |
| rs11145326 |            |            |
| rs11145351 |            |            |

**rs28412916**  
***RASGRF1***

|            |            |            |
|------------|------------|------------|
| rs28412916 | rs28412916 | rs28412916 |
| rs13380109 | rs13380109 | rs13380109 |
| rs13380104 | rs13380104 | rs13380104 |
| rs1007365  | rs1007365  | rs1007365  |
| rs1007366  | rs1007366  | rs1007366  |
| rs755362   | rs755362   | rs755362   |
| rs1961579  | rs1961579  | rs1961579  |
| rs4778634  | rs4778634  | rs4778634  |
| rs3851677  | rs3851677  | rs3851677  |
| rs6495367  | rs6495367  | rs6495367  |

|            |           |           |
|------------|-----------|-----------|
| rs745030   | rs745030  | rs745030  |
| rs4778882  | rs4778882 | rs4778882 |
| rs745029   | rs745029  |           |
| rs1443658  |           |           |
| rs1443657  |           |           |
| rs2049176  |           |           |
| rs6495366  |           |           |
| rs7183818  |           |           |
| rs4778879  |           |           |
| rs2870111  |           |           |
| rs12595749 |           |           |
| rs4778918  |           |           |
| rs1915724  |           |           |

**rs5022942**  
***BMP3***

|            |           |           |
|------------|-----------|-----------|
| rs5022942  | rs5022942 | rs5022942 |
| rs4389567  |           |           |
| rs12642476 |           |           |
| rs985328   |           |           |
| rs1495637  |           |           |
| rs10007784 |           |           |

**rs745480**  
***LRIT2/ LRIT1& RGR***

|            |            |          |
|------------|------------|----------|
| rs745480   | rs745480   | rs745480 |
| rs745479   | rs745479   |          |
| rs11200931 | rs11200931 |          |
| rs7909901  | rs7909901  |          |
| rs6585845  | rs6585845  |          |
| rs3814213  | rs3814213  |          |
| rs4933313  | rs4933313  |          |
| rs7092674  | rs7092674  |          |
| rs7089142  |            |          |
| rs736006   |            |          |
| rs4933985  |            |          |
| rs6585847  |            |          |
| rs4933314  |            |          |
| rs7074150  |            |          |
| rs4933980  |            |          |
| rs4244947  |            |          |
| rs4562752  |            |          |
| rs4424615  |            |          |
| rs10509491 |            |          |
| rs1059341  |            |          |
| rs7073076  |            |          |

|                                                                            |            |            |            |
|----------------------------------------------------------------------------|------------|------------|------------|
|                                                                            | rs11200922 |            |            |
|                                                                            | rs4933976  |            |            |
|                                                                            | rs4933975  |            |            |
|                                                                            | rs10788333 |            |            |
| <b>rs2155413</b>                                                           | rs2155413  | rs2155413  | rs2155413  |
| <b><i>DLG2</i></b>                                                         | rs1073986  |            |            |
|                                                                            | rs10736767 |            |            |
|                                                                            | rs2374576  |            |            |
|                                                                            | rs10751116 |            |            |
|                                                                            | rs4943906  |            |            |
| <b>rs13091182</b>                                                          | rs13091182 | rs13091182 | rs13091182 |
| <b><i>ZBTB38</i></b>                                                       | rs35225290 | rs35225290 | rs35225290 |
|                                                                            | rs13066993 | rs13066993 | rs13066993 |
|                                                                            | rs13099193 | rs13099193 | rs13099193 |
|                                                                            | rs6785073  | rs6785073  | rs6785073  |
|                                                                            | rs6767899  | rs6767899  | rs6767899  |
|                                                                            | rs13069734 | rs13069734 | rs13069734 |
|                                                                            | rs6789653  | rs6789653  | rs6789653  |
|                                                                            | rs6767786  | rs6767786  | rs6767786  |
|                                                                            | rs9822327  | rs9822327  | rs9822327  |
|                                                                            | rs9822195  | rs9822195  | rs9822195  |
|                                                                            | rs9821337  | rs9821337  | rs9821337  |
|                                                                            | rs9858603  | rs9858603  | rs9858603  |
|                                                                            | rs13068065 | rs13068065 | rs13068065 |
|                                                                            | rs13067032 | rs13067032 | rs13067032 |
|                                                                            | rs2011092  | rs2011092  |            |
|                                                                            | rs6807935  |            |            |
| <b>rs17400325</b>                                                          | rs17400325 | rs17400325 | rs17400325 |
| <b><i>PDE11A &amp; LOC105373764</i></b>                                    |            |            |            |
| <b>rs17428076</b>                                                          | rs17428076 | rs17428076 | rs17428076 |
| <b><i>HAT1 &amp; LOC100420002 (pseudogene)/<br/>METAP1D &amp; DLX1</i></b> | rs72890842 | rs72890842 |            |
|                                                                            | rs62183762 | rs62183762 |            |
|                                                                            | rs62183765 | rs62183765 |            |
|                                                                            | rs55864623 | rs55864623 |            |
|                                                                            | rs72889094 | rs72889094 |            |
|                                                                            | rs56401580 | rs56401580 |            |
|                                                                            | rs17581439 | rs17500114 |            |
|                                                                            | rs62182374 | rs17615262 |            |

|            |            |
|------------|------------|
| rs62182373 | rs3765166  |
| rs62182372 | rs3736499  |
| rs72885532 | rs12622895 |
| rs72885529 | rs3770455  |
| rs17615262 |            |
| rs17581361 |            |
| rs17581347 |            |
| rs12614709 |            |
| rs12619041 |            |
| rs56218609 |            |
| rs62183808 |            |
| rs6761111  |            |
| rs17428174 |            |
| rs55863868 |            |
| rs72892835 |            |
| rs17500114 |            |
| rs62182430 |            |
| rs72889848 |            |
| rs57775770 |            |
| rs12622895 |            |
| rs12053046 |            |
| rs3770455  |            |
| rs57718990 |            |
| rs6749895  |            |
| rs3821093  |            |
| rs3736499  |            |
| rs55957712 |            |
| rs6704590  |            |
| rs62183852 |            |
| rs62182392 |            |
| rs3765166  |            |
| rs788168   |            |
| rs788164   |            |

**rs6480859**  
**KCNMA1**

|            |            |            |
|------------|------------|------------|
| rs6480859  | rs6480859  | rs6480859  |
| rs11002118 | rs11002118 | rs11002118 |
| rs10824526 | rs10824526 | rs10824526 |
| rs11002117 | rs11002117 | rs11002117 |
| rs7919150  | rs7919150  | rs7919150  |
| rs7923107  | rs7923107  | rs7923107  |
| rs10824525 | rs10824525 | rs10824525 |
| rs10824523 | rs10824523 | rs10824523 |

|            |            |
|------------|------------|
| rs10509386 | rs10509386 |
| rs11002120 | rs11002120 |
| rs10824527 | rs10824527 |
| rs11002123 | rs11002123 |
| rs17486753 | rs17486753 |
| rs10509387 | rs10509387 |
| rs10824531 | rs10824531 |
| rs11002122 | rs11002122 |
| rs71475646 | rs71475646 |
| rs10509385 |            |
| rs11002121 |            |
| rs11002125 |            |
| rs10824520 |            |
| rs11002133 |            |
| rs7918140  |            |
| rs7903931  |            |
| rs11002137 |            |
| rs10824534 |            |
| rs11002140 |            |
| rs12358397 |            |
| rs12355027 |            |
| rs17407165 |            |
| rs11002109 |            |
| rs10824516 |            |
| rs10824515 |            |
| rs11002108 |            |
| rs10824519 |            |
| rs7897426  |            |
| rs10824518 |            |
| rs7895108  |            |
| rs11002126 |            |
| rs10824530 |            |

|                                               |            |            |           |
|-----------------------------------------------|------------|------------|-----------|
| <b>rs4291789</b>                              | rs4291789  | rs4291789  | rs4291789 |
| <b><i>ZIC2 &amp; LINC00554/ NDUFA12P1</i></b> | rs35266498 | rs35266498 |           |
| <b><i>(pseudogene)</i></b>                    |            |            |           |

---

\*The nearest genes loci. One gene was listed when SNP located in gene, and two or more than two genes were listed when SNP located between genes (upstream/downstream).

**Supplementary Table S2. Chromosome location and RegulomeDB scores for all index and proxy SNPs at  $r^2$  threshold of 0.8.**

| Chromosome location | RefSNP            | RegulomeDB Scores |
|---------------------|-------------------|-------------------|
| chr17:31239644      | rs10512441        | 1a                |
| chr1:207472188      | rs2802236         | 1b                |
| chr1:207483444      | rs2564974         | 1b                |
| chr1:207494415      | rs2564978         | 1b                |
| chr9:71791546       | rs1538583         | 1b                |
| chr18:72168485      | rs8084410         | 1b                |
| chr1:207456473      | rs12095015        | 1d                |
| chr1:207502533      | rs6700168         | 1d                |
| chr12:56115584      | <b>rs3138142</b>  | 1d                |
| chr17:31184630      | rs17183628        | 1d                |
| chr18:72177231      | rs11151960        | 1d                |
| chr1:207387765      | rs1346720         | 1f                |
| chr1:207424726      | rs7545125         | 1f                |
| chr1:207470459      | <b>rs1652333</b>  | 1f                |
| chr1:207478979      | rs1572275         | 1f                |
| chr1:207501210      | rs4844592         | 1f                |
| chr1:207506328      | rs10864231        | 1f                |
| chr1:207507480      | rs1507758         | 1f                |
| chr1:207509364      | rs1507760         | 1f                |
| chr9:71733141       | rs11145326        | 1f                |
| chr9:71770938       | rs11145488        | 1f                |
| chr12:56114768      | <b>rs3138144</b>  | 1f                |
| chr17:31187215      | rs17781142        | 1f                |
| chr18:72154930      | rs747176          | 1f                |
| chr18:72167123      | rs3764509         | 1f                |
| chr18:72167801      | rs12605820        | 1f                |
| chr18:72168607      | rs2303463         | 1f                |
| chr18:72170298      | rs4891557         | 1f                |
| chr18:72170396      | rs4891559         | 1f                |
| chr18:72174022      | <b>rs12971120</b> | 1f                |
| chr18:72174979      | rs3829640         | 1f                |
| chr18:72176082      | rs2278161         | 1f                |
| chr18:72178160      | rs2278159         | 1f                |
| chr18:72178299      | rs2278158         | 1f                |
| chr18:72179578      | rs734559          | 1f                |
| chr18:72182964      | rs3794950         | 1f                |
| chr10:60315642      | rs1820542         | 2a                |
| chr1:207489958      | rs6671700         | 2b                |
| chr1:207490318      | rs891378          | 2b                |
| chr1:207496998      | rs2782828         | 2b                |
| chr2:172680871      | rs12614709        | 2b                |



|                |                  |    |
|----------------|------------------|----|
| chr2:172667894 | rs3770455        | 2b |
| chr2:172878553 | rs6704590        | 2b |
| chr2:172917798 | rs788168         | 2b |
| chr3:53857802  | rs12676          | 2b |
| chr3:141150989 | rs6789653        | 2b |
| chr8:61631570  | rs10106752       | 2b |
| chr9:71736687  | rs11145351       | 2b |
| chr10:60269325 | rs11006169       | 2b |
| chr10:60271530 | rs7087998        | 2b |
| chr10:60271939 | rs7095501        | 2b |
| chr10:60272247 | rs7074778        | 2b |
| chr10:60276905 | rs7098326        | 2b |
| chr10:60277488 | rs1365741        | 2b |
| chr10:60290969 | rs1427222        | 2b |
| chr10:60330421 | rs1658429        | 2b |
| chr10:60276181 | rs1896244        | 2b |
| chr15:79381704 | rs745030         | 2b |
| chr15:79381704 | rs745030         | 2b |
| chr15:79403584 | rs2870111        | 2b |
| chr18:72180518 | rs3794953        | 2b |
| chr1:207474364 | rs77542432       | 3a |
| chr1:207476140 | rs2802238        | 3a |
| chr1:207491488 | rs891376         | 3a |
| chr1:207500292 | rs4844591        | 3a |
| chr1:207501871 | rs6700079        | 3a |
| chr1:207502346 | rs6702997        | 3a |
| chr1:207508491 | rs1354942        | 3a |
| chr1:207508729 | rs7555030        | 3a |
| chr1:207414375 | rs113231892      | 3a |
| chr1:207519521 | rs112172464      | 3a |
| chr1:207519522 | rs111911746      | 3a |
| chr2:233406997 | <b>rs1881492</b> | 3a |
| chr2:172527237 | rs72889848       | 3a |
| chr2:172913389 | rs788164         | 3a |
| chr3:141129998 | rs13066993       | 3a |
| chr4:81924727  | rs17005016       | 3a |
| chr4:81925095  | rs963857         | 3a |
| chr8:61632195  | rs13264416       | 3a |
| chr8:61664213  | rs876957         | 3a |
| chr8:61665576  | rs1473446        | 3a |
| chr8:61704054  | rs13280978       | 3a |
| chr8:40757401  | rs35334145       | 3a |
| chr9:71805628  | rs4515615        | 3a |
| chr10:60268269 | rs717452         | 3a |

|                 |             |    |
|-----------------|-------------|----|
| chr10:94938227  | rs6583867   | 3a |
| chr10:94940766  | rs11187313  | 3a |
| chr10:60269690  | rs34774248  | 3a |
| chr10:60273897  | rs10763551  | 3a |
| chr10:60276368  | rs11006170  | 3a |
| chr10:60277054  | rs7097576   | 3a |
| chr10:60291547  | rs1593678   | 3a |
| chr10:60291641  | rs1593677   | 3a |
| chr10:60276067  | rs1896246   | 3a |
| chr10:60314182  | rs1658446   | 3a |
| chr10:60330530  | rs7921371   | 3a |
| chr10:60348885  | rs10740731  | 3a |
| chr10:60276082  | rs1896245   | 3a |
| chr10:79043416  | rs11002108  | 3a |
| chr10:79052065  | rs10824516  | 3a |
| chr11:105563858 | rs10895860  | 3a |
| chr11:105605288 | rs7932892   | 3a |
| chr12:56116980  | rs3138137   | 3a |
| chr12:56115777  | rs3138141   | 3a |
| chr17:31073640  | rs75782470  | 3a |
| chr17:31142040  | rs76373015  | 3a |
| chr18:72168311  | rs8084109   | 3a |
| chr18:72177339  | rs11151961  | 3a |
| chr18:72180738  | rs2241510   | 3a |
| chr10:79068689  | rs10824519  | 3b |
| chr1:207433348  | rs10864175  | 4  |
| chr1:207455420  | rs2017760   | 4  |
| chr1:207474396  | rs2782845   | 4  |
| chr1:207476039  | rs971317    | 4  |
| chr1:207482969  | rs2802217   | 4  |
| chr1:207502371  | rs6703002   | 4  |
| chr1:207502890  | rs7548463   | 4  |
| chr1:207503431  | rs925130    | 4  |
| chr1:207503720  | rs925131    | 4  |
| chr1:207506605  | rs12133548  | 4  |
| chr1:207506648  | rs11120733  | 4  |
| chr1:207507627  | rs1507759   | 4  |
| chr1:207509798  | rs1507761   | 4  |
| chr1:207510547  | rs10746462  | 4  |
| chr1:207510595  | rs10746463  | 4  |
| chr1:207510595  | rs112720427 | 4  |
| chr1:207519136  | rs113896552 | 4  |
| chr2:233387634  | rs733603    | 4  |
| chr2:233387634  | rs733603    | 4  |

|                |                   |   |
|----------------|-------------------|---|
| chr2:233408238 | rs2573206         | 4 |
| chr2:233408238 | rs2573206         | 4 |
| chr2:146882414 | rs56075542        | 4 |
| chr2:146888707 | rs61049169        | 4 |
| chr2:233385395 | <b>rs1550094</b>  | 4 |
| chr2:172759775 | rs56401580        | 4 |
| chr3:53837970  | rs4687586         | 4 |
| chr3:53847407  | <b>rs14165</b>    | 4 |
| chr3:141128803 | rs13099193        | 4 |
| chr3:141133959 | <b>rs13091182</b> | 4 |
| chr3:141139329 | rs6785073         | 4 |
| chr4:81941455  | rs6814223         | 4 |
| chr4:81973898  | rs985328          | 4 |
| chr6:129834628 | <b>rs12205363</b> | 4 |
| chr6:129820037 | <b>rs12193446</b> | 4 |
| chr8:40741607  | rs11779358        | 4 |
| chr8:40757391  | rs35313163        | 4 |
| chr9:77149836  | <b>rs7042950</b>  | 4 |
| chr10:60271986 | rs7073504         | 4 |
| chr10:60272368 | rs11817440        | 4 |
| chr10:60273120 | rs7100474         | 4 |
| chr10:60273154 | rs7079648         | 4 |
| chr10:60273429 | rs7078900         | 4 |
| chr10:60273976 | rs10763552        | 4 |
| chr10:60274969 | rs1427198         | 4 |
| chr10:60275149 | rs1427197         | 4 |
| chr10:60276290 | rs1896243         | 4 |
| chr10:60277088 | rs7098606         | 4 |
| chr10:60277548 | rs1365740         | 4 |
| chr10:60278572 | rs1427196         | 4 |
| chr10:60288932 | rs1658483         | 4 |
| chr10:60289030 | rs1649015         | 4 |
| chr10:60290965 | rs1427223         | 4 |
| chr10:60295315 | rs1658467         | 4 |
| chr10:60297573 | rs12259990        | 4 |
| chr10:60274048 | rs10763553        | 4 |
| chr10:60278966 | rs1427195         | 4 |
| chr10:60291693 | rs1593675         | 4 |
| chr10:60313173 | rs1658447         | 4 |
| chr10:60314274 | rs1620186         | 4 |
| chr10:60327526 | rs1658435         | 4 |
| chr10:60330040 | rs1649039         | 4 |
| chr10:60330438 | rs1649038         | 4 |
| chr10:60276914 | rs7098329         | 4 |

|                 |                  |   |
|-----------------|------------------|---|
| chr10:85960667  | rs4933976        | 4 |
| chr10:79051775  | rs10824515       | 4 |
| chr10:79057222  | rs17407165       | 4 |
| chr10:79061457  | rs7895108        | 4 |
| chr10:79065151  | rs7897426        | 4 |
| chr10:79080983  | rs11002118       | 4 |
| chr10:79084780  | rs7919150        | 4 |
| chr10:79099119  | rs10509387       | 4 |
| chr10:79099712  | rs10824531       | 4 |
| chr10:79111390  | rs11002133       | 4 |
| chr10:79137837  | rs10824534       | 4 |
| chr11:105541742 | rs1445617        | 4 |
| chr13:100728200 | rs9517971        | 4 |
| chr15:79373676  | rs6495366        | 4 |
| chr15:79381778  | rs745029         | 4 |
| chr15:79382018  | rs4778882        | 4 |
| chr15:79373676  | rs6495366        | 4 |
| chr15:79381778  | rs745029         | 4 |
| chr15:79382018  | rs4778882        | 4 |
| chr17:31132528  | rs17781005       | 4 |
| chr17:31221316  | rs79640811       | 4 |
| chr18:72166845  | rs3764510        | 4 |
| chr1:207413760  | rs10864156       | 5 |
| chr1:207419031  | rs1864370        | 5 |
| chr1:207420326  | rs1429906        | 5 |
| chr1:207422161  | rs7533825        | 5 |
| chr1:207442363  | rs1367067        | 5 |
| chr1:207448050  | rs10864181       | 5 |
| chr1:207483956  | rs2564975        | 5 |
| chr1:207486114  | rs11120688       | 5 |
| chr1:207504668  | rs2184476        | 5 |
| chr1:207504747  | rs1507757        | 5 |
| chr1:207508949  | rs7512422        | 5 |
| chr1:207521900  | rs112511970      | 5 |
| chr2:233379932  | rs2853443        | 5 |
| chr2:233379932  | rs2853443        | 5 |
| chr2:233379940  | <b>rs1656404</b> | 5 |
| chr2:233379940  | rs1656404        | 5 |
| chr2:146759839  | rs7602000        | 5 |
| chr2:146801176  | rs10803514       | 5 |
| chr2:146813148  | rs61051986       | 5 |
| chr2:146860143  | rs11681759       | 5 |
| chr2:146860624  | rs2201049        | 5 |
| chr2:146889603  | rs17733267       | 5 |

|                |                  |   |
|----------------|------------------|---|
| chr2:233374782 | rs2853441        | 5 |
| chr2:233374844 | rs2741289        | 5 |
| chr2:233375467 | rs2741290        | 5 |
| chr2:172684031 | rs72885529       | 5 |
| chr2:172684032 | rs72885532       | 5 |
| chr2:172886147 | rs17428174       | 5 |
| chr2:172888508 | rs55863868       | 5 |
| chr2:172896586 | rs17500114       | 5 |
| chr2:172693779 | rs3765166        | 5 |
| chr2:172694586 | rs3821093        | 5 |
| chr2:172875441 | rs6749895        | 5 |
| chr3:53847793  | rs893362         | 5 |
| chr3:141095371 | rs13067032       | 5 |
| chr3:141095723 | rs13068065       | 5 |
| chr3:141095948 | rs9858603        | 5 |
| chr3:141096735 | rs9822195        | 5 |
| chr3:141104179 | rs6767786        | 5 |
| chr3:141124606 | rs2011092        | 5 |
| chr3:141130834 | rs35225290       | 5 |
| chr3:141148418 | rs13069734       | 5 |
| chr4:81913992  | rs11099457       | 5 |
| chr4:81918620  | rs2868079        | 5 |
| chr4:81959965  | <b>rs5022942</b> | 5 |
| chr4:81960464  | rs4389567        | 5 |
| chr6:73643288  | <b>rs7744813</b> | 5 |
| chr8:40723037  | rs16890054       | 5 |
| chr8:40736662  | rs72644322       | 5 |
| chr8:40739691  | rs4736884        | 5 |
| chr8:40742056  | rs72632903       | 5 |
| chr8:40743751  | rs4736886        | 5 |
| chr8:60181300  | rs7812962        | 5 |
| chr8:61598553  | rs4738814        | 5 |
| chr8:61613024  | rs4738816        | 5 |
| chr8:61616842  | rs35331770       | 5 |
| chr8:61618712  | rs1017861        | 5 |
| chr8:61656510  | rs7011801        | 5 |
| chr8:61662347  | rs28710955       | 5 |
| chr8:61727586  | rs4738828        | 5 |
| chr8:61727908  | rs4738829        | 5 |
| chr8:40723037  | rs16890054       | 5 |
| chr8:40736662  | rs72644322       | 5 |
| chr8:40739691  | rs4736884        | 5 |
| chr8:40740935  | rs13267110       | 5 |
| chr8:40742056  | rs72632903       | 5 |

|                |            |   |
|----------------|------------|---|
| chr8:40743751  | rs4736886  | 5 |
| chr8:40749373  | rs11779532 | 5 |
| chr8:40749959  | rs11776113 | 5 |
| chr8:40751023  | rs11780608 | 5 |
| chr8:40751703  | rs9969525  | 5 |
| chr8:40754420  | rs11780139 | 5 |
| chr8:40759407  | rs11779864 | 5 |
| chr8:40760900  | rs35365471 | 5 |
| chr8:40763734  | rs13251462 | 5 |
| chr8:40773798  | rs7821235  | 5 |
| chr9:77140950  | rs10869412 | 5 |
| chr9:71763361  | rs11145442 | 5 |
| chr9:71827134  | rs56207218 | 5 |
| chr10:60267136 | rs1346302  | 5 |
| chr10:60269737 | rs36097682 | 5 |
| chr10:60269754 | rs1427201  | 5 |
| chr10:60270234 | rs7921207  | 5 |
| chr10:60270259 | rs7910442  | 5 |
| chr10:60271371 | rs7091440  | 5 |
| chr10:60274181 | rs10826198 | 5 |
| chr10:60274212 | rs10826199 | 5 |
| chr10:60274605 | rs7897298  | 5 |
| chr10:60274927 | rs1427200  | 5 |
| chr10:60274940 | rs1427199  | 5 |
| chr10:60276828 | rs7094882  | 5 |
| chr10:60281089 | rs1658493  | 5 |
| chr10:60285819 | rs1649023  | 5 |
| chr10:60285866 | rs1649022  | 5 |
| chr10:60285923 | rs1658489  | 5 |
| chr10:60289338 | rs1658481  | 5 |
| chr10:60289373 | rs1658480  | 5 |
| chr10:60289388 | rs1649092  | 5 |
| chr10:60289397 | rs1658479  | 5 |
| chr10:60289439 | rs1649091  | 5 |
| chr10:60290619 | rs1427224  | 5 |
| chr10:60292433 | rs1649082  | 5 |
| chr10:60292443 | rs1649081  | 5 |
| chr10:60292663 | rs1658468  | 5 |
| chr10:60295341 | rs1649074  | 5 |
| chr10:60268397 | rs717453   | 5 |
| chr10:60278139 | rs12264028 | 5 |
| chr10:60278254 | rs12248958 | 5 |
| chr10:60304863 | rs1649068  | 5 |
| chr10:60305915 | rs1649066  | 5 |

|                |            |   |
|----------------|------------|---|
| chr10:60306385 | rs1649065  | 5 |
| chr10:60306769 | rs1658454  | 5 |
| chr10:60308406 | rs1614258  | 5 |
| chr10:60310479 | rs1649060  | 5 |
| chr10:60311113 | rs1658452  | 5 |
| chr10:60311526 | rs1658451  | 5 |
| chr10:60316925 | rs1658443  | 5 |
| chr10:60318896 | rs1658442  | 5 |
| chr10:60320044 | rs1649055  | 5 |
| chr10:60326582 | rs1658438  | 5 |
| chr10:60327046 | rs1649045  | 5 |
| chr10:60327733 | rs1621227  | 5 |
| chr10:60328087 | rs1626606  | 5 |
| chr10:60328208 | rs1649043  | 5 |
| chr10:60329068 | rs1658432  | 5 |
| chr10:60333002 | rs1658418  | 5 |
| chr10:60333259 | rs2393448  | 5 |
| chr10:60339097 | rs4948523  | 5 |
| chr10:60341397 | rs10763556 | 5 |
| chr10:60341933 | rs10763558 | 5 |
| chr10:60352887 | rs10740732 | 5 |
| chr10:60288530 | rs1649017  | 5 |
| chr10:60288539 | rs1649016  | 5 |
| chr10:60288542 | rs1658484  | 5 |
| chr10:60306088 | rs1658455  | 5 |
| chr10:60321996 | rs1649051  | 5 |
| chr10:60330916 | rs1658428  | 5 |
| chr10:60333038 | rs1658417  | 5 |
| chr10:60341514 | rs10763557 | 5 |
| chr10:60365754 | rs4245599  | 5 |
| chr10:60266838 | rs1863664  | 5 |
| chr10:60267309 | rs1346301  | 5 |
| chr10:60267639 | rs1427204  | 5 |
| chr10:60267916 | rs1427202  | 5 |
| chr10:60268598 | rs4113952  | 5 |
| chr10:60268782 | rs6481400  | 5 |
| chr10:60268879 | rs6481401  | 5 |
| chr10:60268976 | rs6481402  | 5 |
| chr10:60269099 | rs7917717  | 5 |
| chr10:94926188 | rs56871408 | 5 |
| chr10:94927738 | rs11187304 | 5 |
| chr10:94937674 | rs12357177 | 5 |
| chr10:94942675 | rs55744367 | 5 |
| chr10:94949807 | rs7920484  | 5 |

|                 |                  |   |
|-----------------|------------------|---|
| chr10:94953257  | rs17382981       | 5 |
| chr10:85960148  | rs10788333       | 5 |
| chr10:85960394  | rs4933975        | 5 |
| chr10:85961757  | rs11200922       | 5 |
| chr10:85962649  | rs7073076        | 5 |
| chr10:85974235  | rs3814213        | 5 |
| chr10:85976964  | rs1059341        | 5 |
| chr10:85980727  | rs4933314        | 5 |
| chr10:85981800  | rs6585847        | 5 |
| chr10:85986553  | <b>rs745480</b>  | 5 |
| chr10:85986695  | rs745479         | 5 |
| chr10:85989878  | rs11200931       | 5 |
| chr10:85991082  | rs7909901        | 5 |
| chr10:79052562  | rs11002109       | 5 |
| chr10:79066772  | rs12355027       | 5 |
| chr10:79070781  | rs71475646       | 5 |
| chr10:79077270  | rs10824525       | 5 |
| chr10:79079747  | rs11002117       | 5 |
| chr10:79081947  | <b>rs6480859</b> | 5 |
| chr10:79086858  | rs10509385       | 5 |
| chr10:79090111  | rs17486753       | 5 |
| chr10:79095024  | rs11002126       | 5 |
| chr10:79114119  | rs7918140        | 5 |
| chr10:79124593  | rs11002137       | 5 |
| chr11:105563479 | rs1838668        | 5 |
| chr11:105564196 | rs1445618        | 5 |
| chr11:105571838 | rs2028816        | 5 |
| chr11:105576956 | rs639076         | 5 |
| chr11:105577199 | rs638099         | 5 |
| chr11:105583606 | rs12290919       | 5 |
| chr11:105585682 | rs499945         | 5 |
| chr11:105586570 | rs590928         | 5 |
| chr11:105589768 | rs1938965        | 5 |
| chr11:105610204 | rs7928594        | 5 |
| chr11:40149299  | rs11606250       | 5 |
| chr11:40149304  | rs11602008       | 5 |
| chr11:40149606  | <b>rs1381566</b> | 5 |
| chr13:100724927 | rs9517967        | 5 |
| chr13:100728476 | rs9517973        | 5 |
| chr13:100728699 | rs9517974        | 5 |
| chr13:100736484 | rs7322740        | 5 |
| chr13:100672920 | <b>rs4291789</b> | 5 |
| chr15:35006072  | rs634990         | 5 |
| chr15:35008334  | rs685352         | 5 |



|                |                   |   |
|----------------|-------------------|---|
| chr15:79372412 | rs7183818         | 5 |
| chr15:79372874 | <b>rs4778879</b>  | 5 |
| chr15:79376600 | rs755362          | 5 |
| chr15:79378166 | <b>rs28412916</b> | 5 |
| chr15:79378774 | rs13380109        | 5 |
| chr15:79378820 | rs13380104        | 5 |
| chr15:79379491 | rs1007365         | 5 |
| chr15:79379540 | rs1007366         | 5 |
| chr15:79380515 | rs1961579         | 5 |
| chr15:79380821 | rs4778634         | 5 |
| chr15:79380868 | rs3851677         | 5 |
| chr15:79378166 | rs28412916        | 5 |
| chr15:79378774 | rs13380109        | 5 |
| chr15:79378820 | rs13380104        | 5 |
| chr15:79379491 | rs1007365         | 5 |
| chr15:79372412 | rs7183818         | 5 |
| chr15:79372874 | rs4778879         | 5 |
| chr15:79376600 | rs755362          | 5 |
| chr15:79379540 | rs1007366         | 5 |
| chr15:79380515 | rs1961579         | 5 |
| chr15:79380821 | rs4778634         | 5 |
| chr15:79380868 | rs3851677         | 5 |
| chr15:79386365 | rs1443658         | 5 |
| chr15:79386945 | rs1443657         | 5 |
| chr15:79392547 | rs2049176         | 5 |
| chr15:79434039 | rs4778918         | 5 |
| chr15:79441026 | rs1915724         | 5 |
| chr16:7459346  | rs10500355        | 5 |
| chr17:31029124 | rs17183113        | 5 |
| chr17:31035017 | rs75393526        | 5 |
| chr17:31036153 | rs9911168         | 5 |
| chr17:31036764 | rs9303654         | 5 |
| chr17:31078271 | <b>rs17183295</b> | 5 |
| chr17:31103974 | rs4795719         | 5 |
| chr17:31119036 | rs17780981        | 5 |
| chr17:31142748 | rs79957065        | 5 |
| chr17:31190723 | rs62070187        | 5 |
| chr17:31251710 | rs62067167        | 5 |
| chr18:72169394 | rs12608037        | 5 |
| chr18:72170005 | rs34676212        | 5 |
| chr18:72170358 | rs4891558         | 5 |
| chr18:72174826 | rs3794955         | 5 |
| chr18:72175813 | rs2278162         | 5 |
| chr1:207422995 | rs877049          | 6 |

|                |             |   |
|----------------|-------------|---|
| chr1:207425042 | rs7543250   | 6 |
| chr1:207436814 | rs4611012   | 6 |
| chr1:207440850 | rs6540896   | 6 |
| chr1:207443552 | rs6703857   | 6 |
| chr1:207445760 | rs10864180  | 6 |
| chr1:207471223 | rs2802233   | 6 |
| chr1:207471588 | rs2802234   | 6 |
| chr1:207475595 | rs971318    | 6 |
| chr1:207488003 | rs1858001   | 6 |
| chr1:207488767 | rs2914937   | 6 |
| chr1:207526592 | rs2135923   | 6 |
| chr1:207513217 | rs116218947 | 6 |
| chr1:207516498 | rs79515725  | 6 |
| chr1:207526592 | rs113849985 | 6 |
| chr2:146759189 | rs11674960  | 6 |
| chr2:146762575 | rs1515232   | 6 |
| chr2:146798738 | rs17491167  | 6 |
| chr2:146806473 | rs6717099   | 6 |
| chr2:146810402 | rs2130860   | 6 |
| chr2:146817478 | rs62168236  | 6 |
| chr2:146820231 | rs4662453   | 6 |
| chr2:146822908 | rs12612023  | 6 |
| chr2:146826110 | rs1399668   | 6 |
| chr2:146830646 | rs7577806   | 6 |
| chr2:146831279 | rs1515250   | 6 |
| chr2:146831737 | rs72854321  | 6 |
| chr2:146835749 | rs1515247   | 6 |
| chr2:146836051 | rs2035788   | 6 |
| chr2:146837223 | rs2035789   | 6 |
| chr2:146838926 | rs11691697  | 6 |
| chr2:146839536 | rs59126787  | 6 |
| chr2:146850673 | rs12611909  | 6 |
| chr2:146876921 | rs62169493  | 6 |
| chr2:233375783 | rs2117770   | 6 |
| chr2:172600715 | rs12619041  | 6 |
| chr2:172682600 | rs17581347  | 6 |
| chr2:172682611 | rs17581361  | 6 |
| chr2:172683480 | rs17615262  | 6 |
| chr2:172684486 | rs62182372  | 6 |
| chr2:172685681 | rs62182374  | 6 |
| chr2:172737266 | rs17581439  | 6 |
| chr2:172748689 | rs55864623  | 6 |
| chr2:172772836 | rs62182430  | 6 |
| chr2:172794768 | rs72889094  | 6 |

|                |                  |   |
|----------------|------------------|---|
| chr2:172843277 | rs72890842       | 6 |
| chr2:172862313 | rs56218609       | 6 |
| chr2:172883567 | rs6761111        | 6 |
| chr2:172587955 | rs55957712       | 6 |
| chr2:172673398 | rs12053046       | 6 |
| chr2:172686303 | rs12622895       | 6 |
| chr2:172721761 | rs62182392       | 6 |
| chr2:172926210 | rs62183852       | 6 |
| chr3:53849509  | rs4687587        | 6 |
| chr3:141096184 | rs9821337        | 6 |
| chr4:81897004  | rs10004901       | 6 |
| chr4:81930813  | <b>rs1960445</b> | 6 |
| chr4:81894985  | rs4693767        | 6 |
| chr4:81966094  | rs12642476       | 6 |
| chr4:81975673  | rs1495637        | 6 |
| chr8:40722868  | rs72641600       | 6 |
| chr8:40723969  | rs869422         | 6 |
| chr8:40734661  | <b>rs2137277</b> | 6 |
| chr8:60178040  | rs7832404        | 6 |
| chr8:61611419  | rs28600309       | 6 |
| chr8:61618947  | rs1017862        | 6 |
| chr8:61642326  | rs10283352       | 6 |
| chr8:61701056  | <b>rs4237036</b> | 6 |
| chr8:61717136  | rs4738826        | 6 |
| chr8:61718464  | rs28609390       | 6 |
| chr8:40734661  | rs2137277        | 6 |
| chr8:40722868  | rs72641600       | 6 |
| chr8:40723969  | rs869422         | 6 |
| chr8:40733019  | rs11774708       | 6 |
| chr8:40747611  | rs7827879        | 6 |
| chr8:40769229  | rs6474283        | 6 |
| chr8:40773507  | rs7817426        | 6 |
| chr9:77144042  | rs7024262        | 6 |
| chr9:77147708  | rs13289812       | 6 |
| chr9:77147719  | rs13283886       | 6 |
| chr9:77152626  | rs10869416       | 6 |
| chr9:77155381  | rs10869418       | 6 |
| chr9:71754152  | rs11145415       | 6 |
| chr9:71755704  | rs11145422       | 6 |
| chr9:71766118  | rs11145461       | 6 |
| chr9:71766592  | rs11145465       | 6 |
| chr9:71794380  | rs7469887        | 6 |
| chr9:71797443  | rs11145582       | 6 |
| chr9:71799195  | rs11145588       | 6 |

|                |                   |   |
|----------------|-------------------|---|
| chr9:71834379  | <b>rs11145746</b> | 6 |
| chr10:60266554 | rs12257983        | 6 |
| chr10:60266639 | rs1863665         | 6 |
| chr10:94912648 | rs10882157        | 6 |
| chr10:94914770 | rs11187298        | 6 |
| chr10:94917412 | rs12358810        | 6 |
| chr10:94928178 | rs117531235       | 6 |
| chr10:94936622 | rs7078201         | 6 |
| chr10:94936643 | rs7078310         | 6 |
| chr10:94939601 | rs10882169        | 6 |
| chr10:94941926 | rs7916761         | 6 |
| chr10:94943012 | rs4918865         | 6 |
| chr10:94943889 | rs10882172        | 6 |
| chr10:94946267 | rs7903804         | 6 |
| chr10:94947317 | rs12360392        | 6 |
| chr10:94954807 | rs72815184        | 6 |
| chr10:94956240 | rs72815186        | 6 |
| chr10:94963390 | rs72815193        | 6 |
| chr10:60278339 | rs12242287        | 6 |
| chr10:60279323 | rs1649034         | 6 |
| chr10:60279633 | rs1649033         | 6 |
| chr10:60279829 | rs1649030         | 6 |
| chr10:60279908 | rs1658496         | 6 |
| chr10:60280322 | rs1658494         | 6 |
| chr10:60280427 | rs1649028         | 6 |
| chr10:60280910 | rs1649027         | 6 |
| chr10:60281583 | rs1649025         | 6 |
| chr10:60285477 | rs28426375        | 6 |
| chr10:60285493 | rs3001714         | 6 |
| chr10:60286158 | rs2577393         | 6 |
| chr10:60288080 | rs1658486         | 6 |
| chr10:60288110 | rs1649019         | 6 |
| chr10:60288149 | rs1649018         | 6 |
| chr10:60288330 | rs1658485         | 6 |
| chr10:60289550 | rs1658478         | 6 |
| chr10:60291907 | rs1593674         | 6 |
| chr10:60292382 | rs1658470         | 6 |
| chr10:60293293 | rs1649080         | 6 |
| chr10:60294378 | rs1593672         | 6 |
| chr10:60294684 | rs1626532         | 6 |
| chr10:60297101 | rs1582827         | 6 |
| chr10:60297661 | rs12261597        | 6 |
| chr10:60298940 | rs1303968         | 6 |
| chr10:60281266 | rs1658492         | 6 |

|                |            |   |
|----------------|------------|---|
| chr10:60289694 | rs1649089  | 6 |
| chr10:60291910 | rs1658471  | 6 |
| chr10:60294624 | rs1579394  | 6 |
| chr10:60301293 | rs7087528  | 6 |
| chr10:60302514 | rs1619284  | 6 |
| chr10:60312710 | rs12569559 | 6 |
| chr10:60314728 | rs2114564  | 6 |
| chr10:60314814 | rs2438182  | 6 |
| chr10:60316210 | rs7099881  | 6 |
| chr10:60320445 | rs1623568  | 6 |
| chr10:60320663 | rs1621811  | 6 |
| chr10:60323932 | rs1658440  | 6 |
| chr10:60324094 | rs1649049  | 6 |
| chr10:60324281 | rs1649048  | 6 |
| chr10:60325985 | rs1658439  | 6 |
| chr10:60326108 | rs1649046  | 6 |
| chr10:60326909 | rs1658436  | 6 |
| chr10:60328755 | rs1658434  | 6 |
| chr10:60329124 | rs3001717  | 6 |
| chr10:60329229 | rs2842083  | 6 |
| chr10:60331503 | rs1658427  | 6 |
| chr10:60331927 | rs1658421  | 6 |
| chr10:60332700 | rs1649035  | 6 |
| chr10:60343029 | rs2393449  | 6 |
| chr10:60343526 | rs12263522 | 6 |
| chr10:60347409 | rs10763559 | 6 |
| chr10:60360833 | rs893370   | 6 |
| chr10:60279741 | rs1649031  | 6 |
| chr10:60285508 | rs3001715  | 6 |
| chr10:60293318 | rs1649079  | 6 |
| chr10:60293319 | rs1649078  | 6 |
| chr10:60295968 | rs1593671  | 6 |
| chr10:60300765 | rs1593670  | 6 |
| chr10:60305239 | rs1649067  | 6 |
| chr10:60308557 | rs7914888  | 6 |
| chr10:60309601 | rs1658453  | 6 |
| chr10:60323020 | rs1658441  | 6 |
| chr10:60327297 | rs1649044  | 6 |
| chr10:85966872 | rs7092674  | 6 |
| chr10:85975245 | rs6585845  | 6 |
| chr10:85977174 | rs10509491 | 6 |
| chr10:85978938 | rs4244947  | 6 |
| chr10:79083870 | rs10824526 | 6 |
| chr10:79085682 | rs7923107  | 6 |

|                 |                  |   |
|-----------------|------------------|---|
| chr10:79087618  | rs11002121       | 6 |
| chr10:79088003  | rs10824527       | 6 |
| chr10:79097665  | rs10824530       | 6 |
| chr10:79114689  | rs7903931        | 6 |
| chr10:79141035  | rs11002140       | 6 |
| chr11:105553562 | rs10895856       | 6 |
| chr11:105561599 | rs11226825       | 6 |
| chr11:105565465 | rs994575         | 6 |
| chr11:105566241 | rs61900312       | 6 |
| chr11:105569355 | rs10791767       | 6 |
| chr11:105582612 | rs519193         | 6 |
| chr11:105587364 | rs687502         | 6 |
| chr11:105593542 | rs7931588        | 6 |
| chr11:105596418 | rs1938963        | 6 |
| chr11:105597152 | rs2155043        | 6 |
| chr11:105602879 | rs10895871       | 6 |
| chr11:105604718 | rs10895872       | 6 |
| chr11:105605117 | rs11226835       | 6 |
| chr11:105605818 | rs7944207        | 6 |
| chr11:105607715 | rs1938971        | 6 |
| chr11:84634789  | <b>rs2155413</b> | 6 |
| chr11:84636899  | rs10751116       | 6 |
| chr11:84637064  | rs10736767       | 6 |
| chr11:84638734  | rs1073986        | 6 |
| chr11:84638825  | rs4943906        | 6 |
| chr13:100688670 | rs9585326        | 6 |
| chr13:100727589 | rs7321870        | 6 |
| chr13:100727677 | rs7320677        | 6 |
| chr13:100818091 | <b>rs2184971</b> | 6 |
| chr13:100735420 | rs9513723        | 6 |
| chr15:35006599  | rs16959560       | 6 |
| chr16:7460698   | rs7184522        | 6 |
| chr17:31018702  | rs113602044      | 6 |
| chr17:31026840  | rs77819475       | 6 |
| chr17:31029547  | rs78418651       | 6 |
| chr17:31036492  | rs9912761        | 6 |
| chr17:31037893  | rs75822124       | 6 |
| chr17:31038658  | rs9898762        | 6 |
| chr17:31056291  | rs1990825        | 6 |
| chr17:31086432  | rs62070164       | 6 |
| chr17:31175078  | rs17183600       | 6 |
| chr17:31185041  | rs17781136       | 6 |
| chr17:31230092  | rs62070232       | 6 |
| chr17:31246584  | rs62067160       | 6 |

|                |                   |         |
|----------------|-------------------|---------|
| chr17:68718733 | <b>rs4793501</b>  | 6       |
| chr18:72165057 | rs8083001         | 6       |
| chr18:72169266 | rs7241558         | 6       |
| chr18:72169707 | rs12968731        | 6       |
| chr18:72169722 | rs71359051        | 6       |
| chr1:207410964 | rs7522701         | No Data |
| chr1:207415562 | rs6664815         | No Data |
| chr1:207420858 | rs6540888         | No Data |
| chr1:207421571 | rs10864167        | No Data |
| chr1:207426564 | rs1835307         | No Data |
| chr1:207435828 | rs1579484         | No Data |
| chr1:207441496 | rs11120586        | No Data |
| chr1:207443570 | rs6703860         | No Data |
| chr1:207444927 | rs59036171        | No Data |
| chr1:207445677 | rs10864178        | No Data |
| chr1:207498643 | rs6681853         | No Data |
| chr1:207505708 | rs6662070         | No Data |
| chr1:207516360 | rs113742197       | No Data |
| chr2:146773947 | <b>rs17412774</b> | No Data |
| chr2:146785402 | rs10928276        | No Data |
| chr2:146824807 | rs1399669         | No Data |
| chr2:146830540 | rs7604349         | No Data |
| chr2:146835247 | rs17491258        | No Data |
| chr2:146835661 | rs1515248         | No Data |
| chr2:146850813 | rs12621488        | No Data |
| chr2:146855991 | rs11675490        | No Data |
| chr2:146889664 | rs17789747        | No Data |
| chr2:233374982 | rs2141422         | No Data |
| chr2:172662613 | rs57718990        | No Data |
| chr2:172687730 | rs57775770        | No Data |
| chr2:172690417 | rs3736499         | No Data |
| chr2:172685554 | rs62182373        | No Data |
| chr2:172828797 | rs62183762        | No Data |
| chr2:172832023 | rs62183765        | No Data |
| chr2:172851935 | <b>rs17428076</b> | No Data |
| chr2:172880074 | rs62183808        | No Data |
| chr2:172894613 | rs72892835        | No Data |
| chr2:178565912 | <b>rs17400325</b> | No Data |
| chr3:53848671  | rs920252          | No Data |
| chr3:141096754 | rs9822327         | No Data |
| chr3:141114292 | rs6807935         | No Data |
| chr3:141125438 | rs6767899         | No Data |
| chr4:81923676  | rs10003846        | No Data |
| chr4:81892036  | rs10049776        | No Data |

|                |                   |         |
|----------------|-------------------|---------|
| chr4:81906968  | rs4693773         | No Data |
| chr4:81925566  | rs9307776         | No Data |
| chr4:81927205  | rs4458448         | No Data |
| chr4:81977689  | rs10007784        | No Data |
| chr8:40710730  | rs11776583        | No Data |
| chr8:40726393  | <b>rs7829127</b>  | No Data |
| chr8:40726581  | rs16890057        | No Data |
| chr8:40729497  | rs6994354         | No Data |
| chr8:40734705  | rs2137278         | No Data |
| chr8:40738800  | rs35015019        | No Data |
| chr8:40752242  | rs7005382         | No Data |
| chr8:60179085  | <b>rs7837791</b>  | No Data |
| chr8:61626086  | rs10104525        | No Data |
| chr8:61667897  | rs1483208         | No Data |
| chr8:61695704  | rs35168272        | No Data |
| chr8:40710730  | rs11776583        | No Data |
| chr8:40726393  | rs7829127         | No Data |
| chr8:40726581  | rs16890057        | No Data |
| chr8:40729497  | rs6994354         | No Data |
| chr8:40734705  | rs2137278         | No Data |
| chr8:40738800  | rs35015019        | No Data |
| chr8:40739277  | rs17648449        | No Data |
| chr8:40752215  | rs6985757         | No Data |
| chr8:40752242  | rs7005382         | No Data |
| chr8:40766300  | rs6474280         | No Data |
| chr8:40772985  | rs7816573         | No Data |
| chr9:77144199  | rs7867494         | No Data |
| chr9:77154450  | rs10869417        | No Data |
| chr9:71753548  | rs11145411        | No Data |
| chr9:71754872  | rs11145421        | No Data |
| chr9:71815903  | rs11145657        | No Data |
| chr9:76348529  | rs117588997       | No Data |
| chr10:60265403 | <b>rs7084402</b>  | No Data |
| chr10:60265956 | rs12250013        | No Data |
| chr10:60266151 | rs12259315        | No Data |
| chr10:94916761 | rs10882163        | No Data |
| chr10:94924323 | <b>rs10882165</b> | No Data |
| chr10:94940824 | rs11187314        | No Data |
| chr10:94941812 | rs7916838         | No Data |
| chr10:94941978 | rs7917125         | No Data |
| chr10:94945556 | rs57346439        | No Data |
| chr10:94946122 | rs7919934         | No Data |
| chr10:94950712 | rs17108260        | No Data |
| chr10:94962713 | rs7894625         | No Data |



|                |            |         |
|----------------|------------|---------|
| chr10:60277248 | rs2170779  | No Data |
| chr10:60278486 | rs11006171 | No Data |
| chr10:60279700 | rs1649032  | No Data |
| chr10:60280152 | rs1658495  | No Data |
| chr10:60281353 | rs1658491  | No Data |
| chr10:60281399 | rs1649026  | No Data |
| chr10:60281615 | rs1658490  | No Data |
| chr10:60286070 | rs6481404  | No Data |
| chr10:60289606 | rs1658477  | No Data |
| chr10:60292041 | rs1649085  | No Data |
| chr10:60292116 | rs1649084  | No Data |
| chr10:60292401 | rs1658469  | No Data |
| chr10:60293905 | rs1649077  | No Data |
| chr10:60294060 | rs1649076  | No Data |
| chr10:60298111 | rs1649072  | No Data |
| chr10:60298207 | rs1658463  | No Data |
| chr10:60298283 | rs1658462  | No Data |
| chr10:60298476 | rs1303970  | No Data |
| chr10:60299150 | rs1658460  | No Data |
| chr10:60282077 | rs1632584  | No Data |
| chr10:60286027 | rs1649021  | No Data |
| chr10:60294169 | rs1593673  | No Data |
| chr10:60299245 | rs1658459  | No Data |
| chr10:60301381 | rs1658458  | No Data |
| chr10:60302715 | rs1658457  | No Data |
| chr10:60303694 | rs1649069  | No Data |
| chr10:60304325 | rs1658456  | No Data |
| chr10:60309214 | rs1649063  | No Data |
| chr10:60309325 | rs1649062  | No Data |
| chr10:60312598 | rs1649059  | No Data |
| chr10:60317086 | rs1649058  | No Data |
| chr10:60318113 | rs1649057  | No Data |
| chr10:60327829 | rs1620404  | No Data |
| chr10:60328662 | rs1649042  | No Data |
| chr10:60328781 | rs1649041  | No Data |
| chr10:60328890 | rs11815274 | No Data |
| chr10:60329165 | rs2917949  | No Data |
| chr10:60329182 | rs2577392  | No Data |
| chr10:60331134 | rs1649037  | No Data |
| chr10:60331546 | rs1658425  | No Data |
| chr10:60331587 | rs1658424  | No Data |
| chr10:60331626 | rs1658423  | No Data |
| chr10:60331757 | rs1658422  | No Data |
| chr10:60331877 | rs1649036  | No Data |

|                 |                   |         |
|-----------------|-------------------|---------|
| chr10:60332811  | rs1658419         | No Data |
| chr10:60338752  | rs4141671         | No Data |
| chr10:60343084  | rs7474570         | No Data |
| chr10:60343637  | rs11006192        | No Data |
| chr10:60351223  | rs4948524         | No Data |
| chr10:60359090  | rs10826202        | No Data |
| chr10:60360422  | rs10763564        | No Data |
| chr10:60264740  | rs2033149         | No Data |
| chr10:60265241  | rs7099496         | No Data |
| chr10:60287634  | rs1346300         | No Data |
| chr10:60297174  | rs1582826         | No Data |
| chr10:60318275  | rs1158212         | No Data |
| chr10:60331541  | rs1658426         | No Data |
| chr10:60361269  | rs4948525         | No Data |
| chr10:85966935  | rs7089142         | No Data |
| chr10:85971108  | rs4933313         | No Data |
| chr10:85978575  | rs4424615         | No Data |
| chr10:85978808  | rs4562752         | No Data |
| chr10:85979231  | rs4933980         | No Data |
| chr10:85980314  | rs7074150         | No Data |
| chr10:85985576  | rs4933985         | No Data |
| chr10:85985919  | rs736006          | No Data |
| chr10:79063541  | rs10824518        | No Data |
| chr10:79067052  | rs12358397        | No Data |
| chr10:79068963  | rs10824520        | No Data |
| chr10:79072452  | rs10824523        | No Data |
| chr10:79086957  | rs10509386        | No Data |
| chr10:79087030  | rs11002120        | No Data |
| chr10:79088889  | rs11002122        | No Data |
| chr10:79088921  | rs11002123        | No Data |
| chr10:79091400  | rs11002125        | No Data |
| chr11:105536017 | rs1822989         | No Data |
| chr11:105549734 | rs1037090         | No Data |
| chr11:105550937 | rs11226822        | No Data |
| chr11:105554202 | rs10895857        | No Data |
| chr11:105556006 | rs1445607         | No Data |
| chr11:105556597 | <b>rs11601239</b> | No Data |
| chr11:105559724 | rs7106983         | No Data |
| chr11:105561553 | rs977516          | No Data |
| chr11:105565950 | rs12790329        | No Data |
| chr11:105566601 | rs1822993         | No Data |
| chr11:105568368 | rs11226827        | No Data |
| chr11:105568410 | rs11226828        | No Data |
| chr11:105570438 | rs1445619         | No Data |

|                 |                   |         |
|-----------------|-------------------|---------|
| chr11:105572625 | rs10895864        | No Data |
| chr11:105574054 | rs1373926         | No Data |
| chr11:105578907 | rs11601808        | No Data |
| chr11:105581199 | rs12417624        | No Data |
| chr11:105582887 | rs521893          | No Data |
| chr11:105585342 | rs627041          | No Data |
| chr11:105586341 | rs1445622         | No Data |
| chr11:105587275 | rs556609          | No Data |
| chr11:105588856 | rs632100          | No Data |
| chr11:105591416 | rs7926520         | No Data |
| chr11:105596275 | rs1938964         | No Data |
| chr11:105596773 | rs1954762         | No Data |
| chr11:105601178 | rs10895870        | No Data |
| chr11:105605902 | rs1938970         | No Data |
| chr11:84638164  | rs2374576         | No Data |
| chr13:100691366 | <b>rs8000973</b>  | No Data |
| chr13:100724657 | rs3848025         | No Data |
| chr13:100726694 | rs9517968         | No Data |
| chr13:100805796 | rs2390401         | No Data |
| chr13:100817994 | rs2152881         | No Data |
| chr13:100730078 | rs12870800        | No Data |
| chr13:100735401 | rs9513722         | No Data |
| chr13:100705064 | rs35266498        | No Data |
| chr15:35005885  | <b>rs524952</b>   | No Data |
| chr15:79375346  | rs6495367         | No Data |
| chr15:79375346  | rs6495367         | No Data |
| chr15:79432358  | rs12595749        | No Data |
| chr16:7459682   | <b>rs17648524</b> | No Data |
| chr16:7462044   | rs4332760         | No Data |
| chr17:31030457  | rs80212824        | No Data |
| chr17:31054124  | rs17183176        | No Data |
| chr17:31066496  | rs62068432        | No Data |
| chr17:31164366  | rs62070183        | No Data |
| chr17:31227592  | rs62070229        | No Data |
| chr17:11407258  | <b>rs2908972</b>  | No Data |

---
